# Supplementary material for: MAVS maintains mitochondrial homeostasis via autophagy
Source: PubMed Central journal article supplement (PMC4986202; doi:10.1038/celldisc.2016.24), 2016-08-16
Supplement: celldisc201624-s1.pdf [file celldisc201624-s1.pdf]

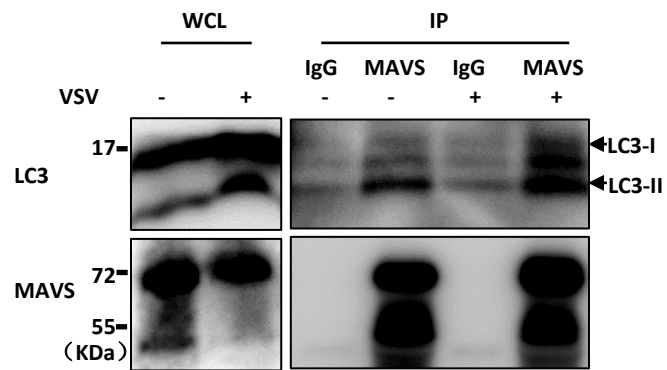

**Figure S1. The interaction between endogenous MAVS and LC3 is enhanced by VSV infection**

HEK293 cells were left untreated or infected with VSV for 6 hours, then the cells were lysed by RIPA buffer and incubated with anti-MAVS antibody or control IgG, then immunoprecipitated with proteinA/G beads, and followed by western blot analysis.
