# Supplementary material for: MAVS maintains mitochondrial homeostasis via autophagy
Source: PubMed Central journal article supplement (PMC4986202; doi:10.1038/celldisc.2016.24), 2016-08-16
Supplement: celldisc201624-s2.pdf [file celldisc201624-s2.pdf]

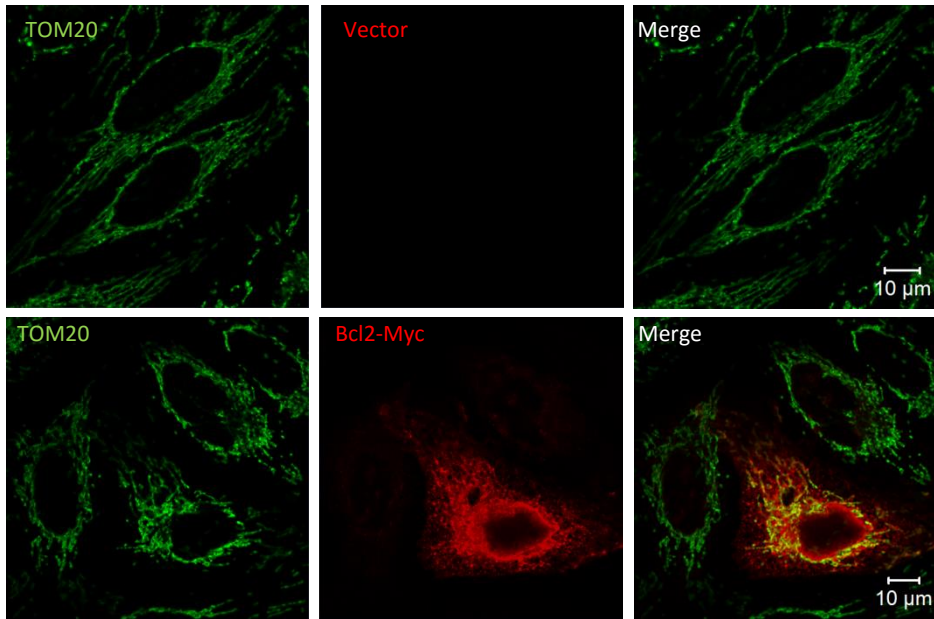

**Figure S2. Overexpression of Bcl2 fails to induce mitochondrial fragmentation**

HeLa cells were transfected with Bcl2-Myc or an empty vector. Twenty-four hours after transfection, the cells were fixed, stained by anti-Myc (red) or anti-TOM20 (green) antibodies, and imaged by confocal microscopy.
