# Supplementary material for: MAVS maintains mitochondrial homeostasis via autophagy
Source: PubMed Central journal article supplement (PMC4986202; doi:10.1038/celldisc.2016.24), 2016-08-16
Supplement: celldisc201624-s3.pdf [file celldisc201624-s3.pdf]

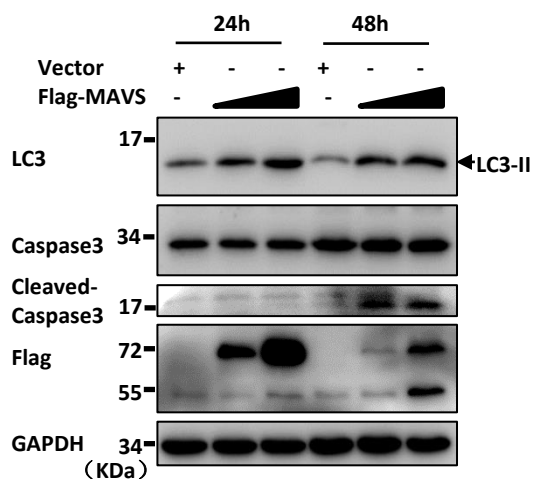

**Figure S3. The effects of overexpression of MAVS in inducing apoptosis at different time points**

HeLa cells were transfected with Flag-MAVS or an empty vector. Twenty-four or forty-eight hours after transfection, the total protein was extracted and subjected to immunoblotting analysis with the indicated antibodies.
