# Supplementary material for: MAVS maintains mitochondrial homeostasis via autophagy
Source: PubMed Central journal article supplement (PMC4986202; doi:10.1038/celldisc.2016.24), 2016-08-16
Supplement: celldisc201624-s6.pdf [file celldisc201624-s6.pdf]

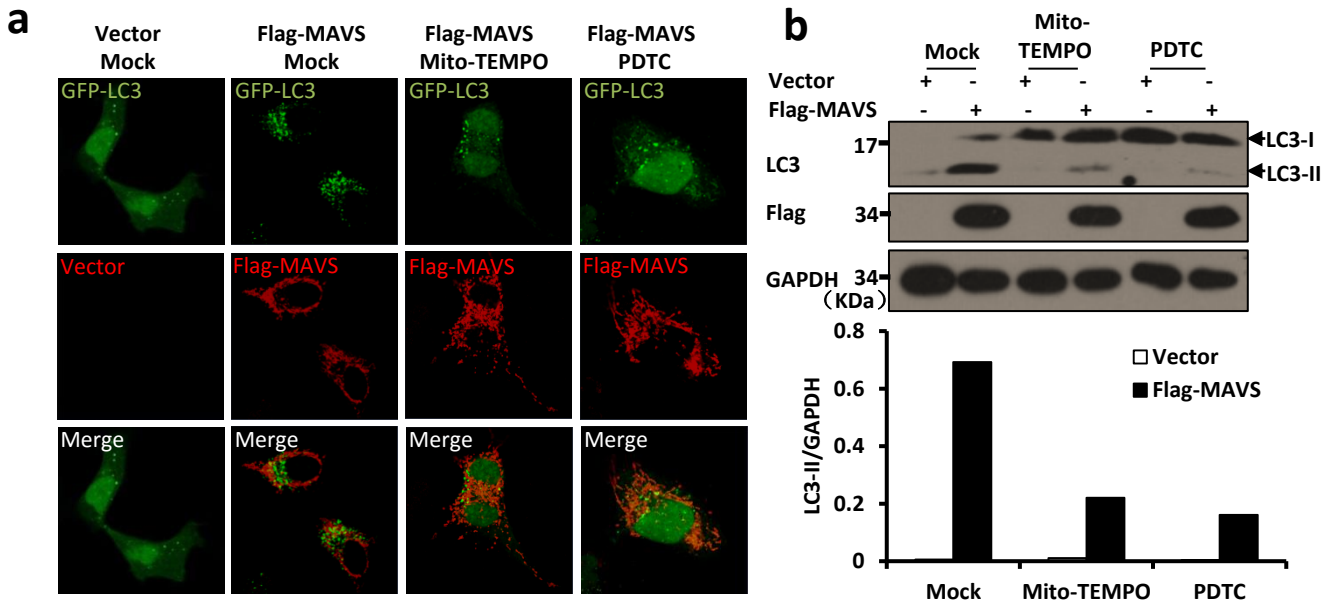

### Figure S6. ROS inhibitors prevent MAVS-induced autophagy

(a) HeLa cells were transfected with GFP-LC3 (green) together with empty vector or Flag-MAVS (red) for 6 hours and then left untreated or treated with Mito-TEMPO (200  $\mu$ M) or PDTC (20  $\mu$ M) for 24 hours. Cells were fixed and stained with the indicated antibodies, then imaged by confocal microscopy.

(b) HeLa cells were transfected with empty vector or Flag-MAVS for 6 hours and then left untreated or treated with Mito-TEMPO (200  $\mu$ M) or PDTC (20  $\mu$ M) for 24 hours, then the cells were lysed directly, and subjected to immunoblotting analysis with the indicated antibodies. Densitometry analyses to quantify levels of LC3-II expression are shown in the bottom panel.
