# Supplementary material for: MAVS maintains mitochondrial homeostasis via autophagy
Source: PubMed Central journal article supplement (PMC4986202; doi:10.1038/celldisc.2016.24), 2016-08-16
Supplement: celldisc201624-s7.pdf [file celldisc201624-s7.pdf]

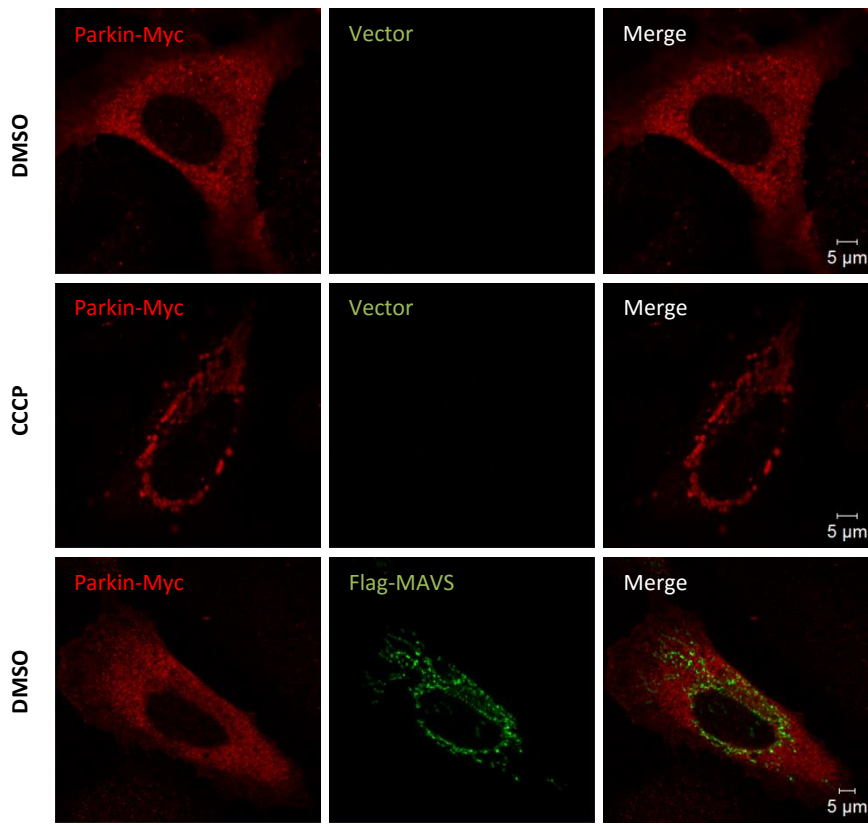

**Figure S7. Parkin isn't likely involved MAVS-mediated autophagy**

HeLa cells were transfected with Parkin-Myc and Flag-MAVS or an empty vector. Twenty-four hours after transfection, the cells were treated with 10 μM CCCP (positive control) for 1 hour. Cells were fixed, stained by anti-Myc (red) or anti-Flag (green) antibodies, and imaged by confocal microscopy.
