# Supplementary material for: MAVS maintains mitochondrial homeostasis via autophagy
Source: PubMed Central journal article supplement (PMC4986202; doi:10.1038/celldisc.2016.24), 2016-08-16
Supplement: celldisc201624-s8.pdf [file celldisc201624-s8.pdf]

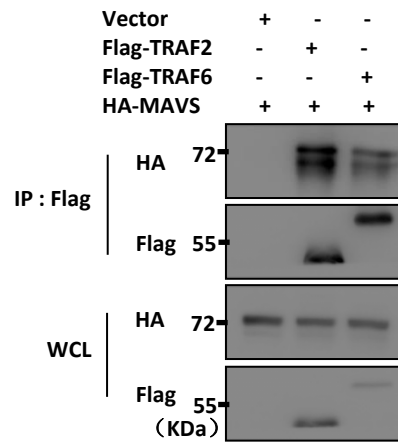

**Figure S8. MAVS interacts with TRAF6/2.**

HEK293 cells were transfected with the indicated plasmids. Twenty-four hours after transfection, the cell lysates were prepared and immunoprecipitated with anti-Flag beads, and followed by western blot analysis.
